# Supplementary material
Source: MDPI journal article supplement (https://www.mdpi.com/2073-4344/10/3/280)
Supplement: s1 [file s1]

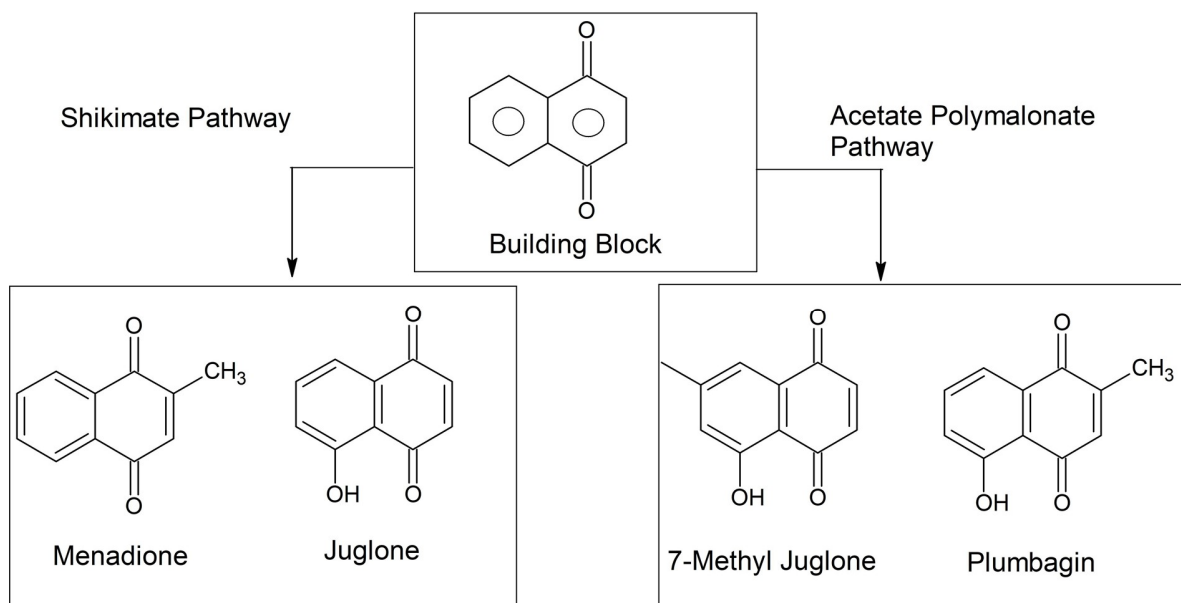

**Figure S1.** Building block and the end products of Shikimate and Acetate Polymalonate Pathway, Menadione & Juglone and 7-methyl juglone & Plumbagin respectively.

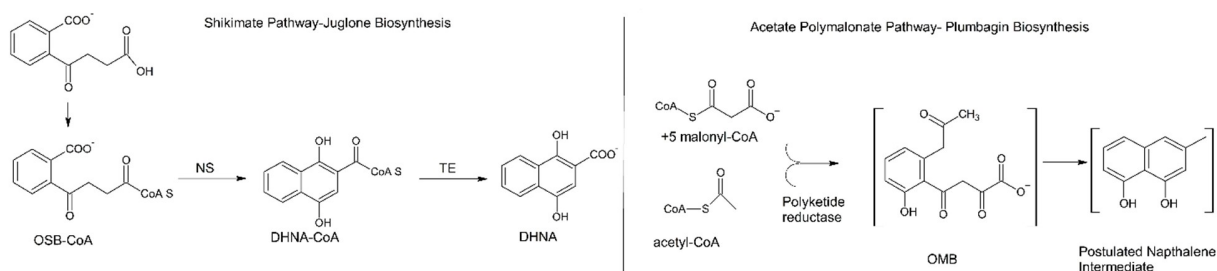

**Figure S2.** Similar intermediates in Juglone and Plumbagin Biosynthesis; NS – Naphthoate Synthase; TS – Thioesterase

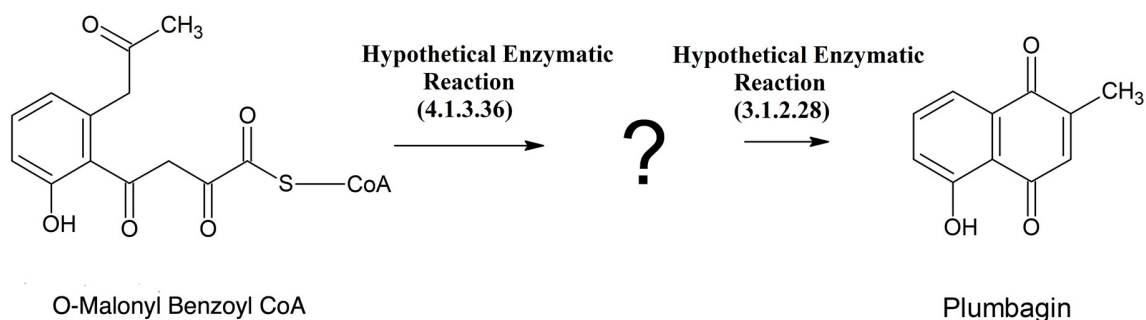

**Figure S3.** Hypothetical Enzyme Reaction for Biosynthesis of Plumbagin. Formation of plumbagin from OMB CoA in two reaction steps



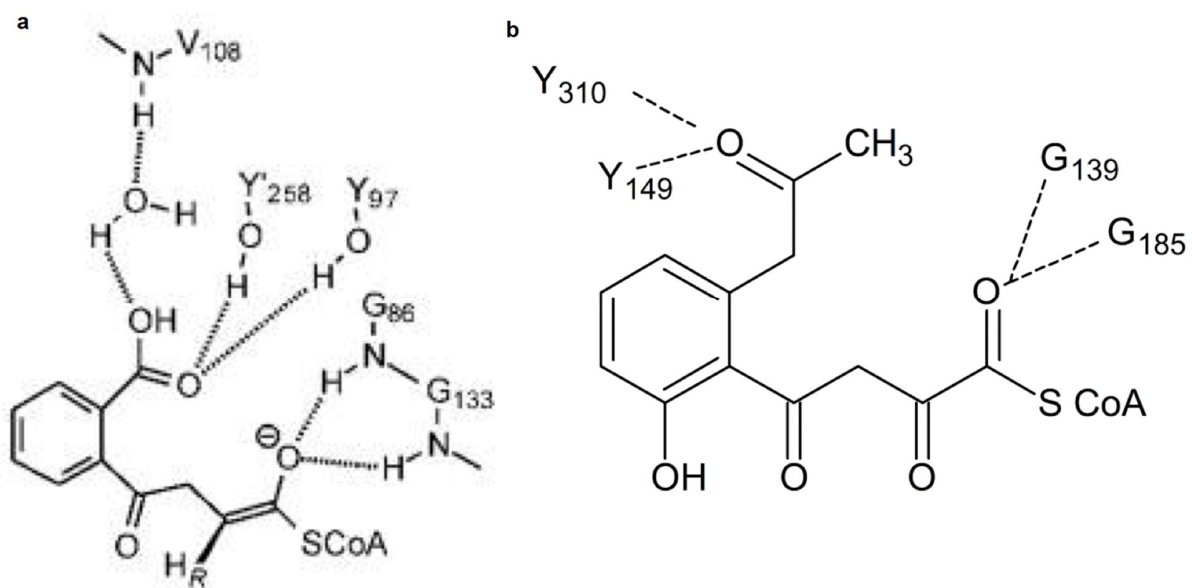

**Figure S6.** Docked conformations of **A.** NS with OSBCoA as reported by Li, HJ et al., 2011. **B.** NS with OMBCoA as per our studies. **B.** Shows identical interactions with as in A with, Gly and Tyr binding OMBCoA as with OSBCoA as in JBP
